# Supplementary material for: Vacuum-free spectroscopy reveals metastable oxygen redox intermediates in oxygen-redox cathodes
Source: Research Square preprint supplement (doi:10.21203/rs.3.rs-8285919/v1), 2026-02-10
Supplement: Supplementary file 1 [file a8172e1505cda7a3247a3d3b.docx]

**Supplementary Information for**

Vacuum-free spectroscopy reveals metastable oxygen redox intermediates in oxygen-redox cathodes

Donggun Eum1,2,10,*, Oscar Paredes Mellone3,10, Eder G. Lomeli1,4, Edward Mu5, Hari Ramachandran1, Dean Skoien3, Emma P. K. L. Choy2,5, Nidhi Kapate1, Serin Lee1, Evan Zoltan Carlson1,6, John Vinson7, Jennifer A. Dionne1, Thomas P. Devereaux1,4,8, Dimosthenis Sokaras3,*, and William C. Chueh1,2,4,9,*

*1*Department of Materials Science and Engineering, Stanford University, Stanford, CA, USA.

*2*SLAC-Stanford Battery Center, Applied Energy Division, SLAC National Accelerator Laboratory, Menlo Park, CA, USA.

*3*Stanford Synchrotron Radiation Lightsource, SLAC National Accelerator Laboratory, Menlo Park, CA, USA.

*4*Stanford Institute for Materials and Energy Sciences, SLAC National Accelerator Laboratory, Menlo Park, CA, USA.

*5*Department of Chemistry, Stanford University, Stanford, CA, USA.

*6*Advanced Light Source, Lawrence Berkeley National Laboratory, Berkeley, CA, USA.

*7*Material Measurement Laboratory, National Institute of Standards and Technology, Gaithersburg, MD, USA.

*8*Geballe Laboratory for Advanced Materials, Stanford University, Stanford, CA, USA.

*9*Department of Energy Science and Engineering, Stanford University, Stanford, CA, USA.

*10*These authors contributed equally to this work.

***Corresponding author: Donggun Eum ([edg9293@stanford.edu](mailto:edg9293@stanford.edu)), Dimosthenis Sokaras ([dsokaras@slac.stanford.edu](mailto:dsokaras@slac.stanford.edu)), and William C. Chueh ([[wcheuh@stanford.edu](mailto:wcheuh@stanford.edu)](mailto:matlgen1@snu.ac.kr))

**Table of Contents**

Supplementary Notes 1 – 6

Supplementary Figures 1 – 18

Supplementary References 8

**Supplementary Note**

**Supplementary Note 1 –Comparison of cryogenic XRS and soft X-ray STXM across oxygen-redox cathodes.**

A direct comparison between cryogenic XRS and soft X-ray STXM for the same samples is shown in Fig. S3. Each top panel presents high-voltage spectra from both techniques, with corresponding differential spectra below. In LiNiO2 (Fig. S3a), the blue-shifted features observed by cryogenic XRS were not captured under STXM, and an additional ~531 eV peak appears. Similarly, in Li2RuO3 (Fig. S3b), the ~531 eV peak is additionally observed with STXM, strongly suggesting that this signal arises from vacuum- or irradiation-induced artifacts in these long-debated materials. For DRX (Fig. S3c), since cryogenic XRS already confirmed molecular O2 as the sole product, negligible differences are seen between XRS and STXM due to the absence of other species that could further convert under vacuum or irradiation. In Li1.13Ni0.3Mn0.57O2 (Fig. S3d), the additional peaks observed by cryogenic XRS vanish in STXM, further underscoring the limitations of conventional oxygen spectroscopies in reliably capturing oxygen-redox intermediates. Overall, these comparisons suggest that conventional oxygen spectroscopies are prone to spectral changes and highlight the ability of cryogenic XRS to more reliably capture intrinsic oxygen-redox states.

**Supplementary Note 2 – Spectral measurement challenges under conventional oxygen spectroscopies.**

To highlight the differences between cryogenic and conventional measurements, we directly compared their differential spectra across the OR plateau in Li1.13Ni0.3Mn0.57O2. The diverse peak evolution in XRS stands in stark contrast to RIXS results, where only a single peak emerges upon OR (Fig. S5).

Fig. S6 illustrates this discrepancy: the top panel presents a differential cryogenic XRS spectrum (#1 #3), while the bottom panels show spectra from various soft X-ray techniques, including STXM, TFY, TEY, RIXS, and XPS (see Fig. S6 caption for details). Consistent with prior reports,1-4 all soft X-ray spectra reveal only one peak evolution at ~531 eV upon OR activation. These results indicate that additional redox products, clearly resolved by cryogenic XRS, have remained undetected under conventional soft X-ray conditions, suggesting that such measurements are susceptible to spectral changes.

**Supplementary Note 3 –** **Evaluation of cryogenic XRS-induced degradation.**

To assess whether cryogenic XRS induces degradation or alters the oxygen-redox state, we reassembled electrochemical cells using electrodes that had undergone XRS measurement and compared their discharge profiles with reference cells. In Fig. S11a and b, the black and purple curves represent the baseline (discharged without rest) and the cell reassembled after cryogenic XRS, respectively. Unlike the significant changes in differential voltage curves observed under elevated temperature and vacuum conditions (**Fig. 2**c), the close similarity between these curves indicates that cryogenic XRS does not noticeably perturb the intrinsic oxygen states during measurement.

To further evaluate slight differences—such as reduced intensity near 3.7 V and delayed discharge onset—we introduced two control conditions. One was a reassembled cell using an electrode that had disassembled after full charge (green curve in Fig. S11a), assessing the effect of disassembly/reassembly. The other was a cell reassembled after the electrode had been exposed to 15 minutes of vacuum in a glovebox chamber (yellow curve in Fig. S11b), simulating the vacuum exposure during XRS sample transfer.

The high-voltage loss observed in the post-XRS differential voltage curve is partially reproduced in the disassembly control, suggesting contributions from ohmic losses associated with cell handling. More importantly, the strong overlap between the XRS and vacuum-exposed (15 min) curves in Fig. S11b indicates that the minor changes are primarily due to vacuum-related handling effects, rather than the XRS measurement itself.

These results confirm that cryogenic XRS, when performed under carefully controlled conditions, does not disturb the intrinsic oxygen-redox state.

**Supplementary Note 4 – Various oxygen configurations enumerated from DFT calculations.**

We performed first-principles calculations based on the Li2MnO3 structure, the parent phase known to host OR activity in Li1.13Ni0.3Mn0.57O2. A series of Li2-xMnO3 structures with varying lithium content (x = 0 to 7/8, in steps of 1/8) were generated to explore possible oxygen configurations upon delithiation. To investigate a broad range of O–O bonding motifs, we applied constraints on selected O–O bond lengths and identified the lowest-energy structure within each category. The resulting motifs correspond to peroxo-like (1.40–1.48 Å), superoxo-like (1.30–1.40 Å), and molecular O2-like (<1.28 Å) species. Our results show that various dimers can form during delithiation (Fig. S13a). Consistent with a previous report,5 these dimers were classified into five structural types—edge (I), *ν*-bridge (II), bridge (III), dangling (IV), and floating (V)—each exhibiting a characteristic O–O bond length within the overall range of 1.22 to 1.45 Å, as indicated in the figure.

In parallel, we also observed a systematic shortening of Mn–O bonds with increasing degress of delithiation (Fig. S13b). In highly delithiated structures, Mn–O bonds contracted below 1.7 Å (from ~1.9 Å in the pristine state), due to strong *π*-interactions between oxygen and adjacent Mn atoms.6 At the extreme Li1/8MnO3 composition, some Mn–O bonds shortened further to ~1.57 Å, driven by local structural rearrangements and reduced coordination numbers (octahedral pyramidal/tetrahedral), facilitated by cation migration or oxygen decoordination.

Together, these calculation results indicate that a wide variety of oxygen bonding states—from dimers to short Mn–O *π*-complexes—can theoretically emerge throughout OR.

**Supplementary Note 5 – Quantification of various oxygen intermediates in Li1.13Ni0.3Mn0.57O2**.

The differential spectra were quantified through linear-combination fitting and integrated peak areas (Fig. S15). During the first half of the voltage plateau, the differential features are dominated by superoxo (60.6%) and molecular oxygen (39.4%). In the second half, however, the superoxo contribution sharply decreases to 8.1%, while molecular oxygen increases to 59.4%, accompanied by the emergence of *π*-complex feature (32.5%). Notably, the total differential spectral area slightly decreases at this stage, consistent with irreversible oxygen loss that depletes detectable oxygen states.7

When averaged across the entire plateau, the reaction comprises a mixture of three distinct species—*π*-complex (13.8%), superoxo (38.3%), and molecular O2 (47.9%). These results demonstrate that OR does not proceed through a single dominant product but rather through a dynamic interplay of multiple intermediates whose relative proportions change during delithiation.

**Supplementary Note 6 – Dependence of formation energy on oxygen partial pressure**.

To evaluate the vacuum effect on oxygen stability, the DFT-calculated formation energies of the “Oxygen Loss” pathways were corrected by incorporating the entropy and partial-pressure contributions of gaseous O2. The entropy term (-) was taken from the tabulated value of O2 at 298.15 K,8 and the pressure-dependent correction was applied as , where = 1 atm. For each “Oxygen Loss” configuration enumerated in **Fig. 4**a, the total correction (-+) was added to the computed formation energy to quantify its variation under different oxygen partial pressures.

Because this correction term applies only to gaseous O2, the solid phases (*e.g.*, Li2MnO3 and intermediate oxides) were not adjusted for pressure dependence, as their entropic and volumetric contributions are negligible within the considered range. Consequently, the resulting pressure dependence directly reflects the change in the chemical potential of O2 and is therefore relevant only to the “Oxygen Loss” pathway, which defines the shaded region in **Fig. 4**a.

**Supplementary Figures**

**
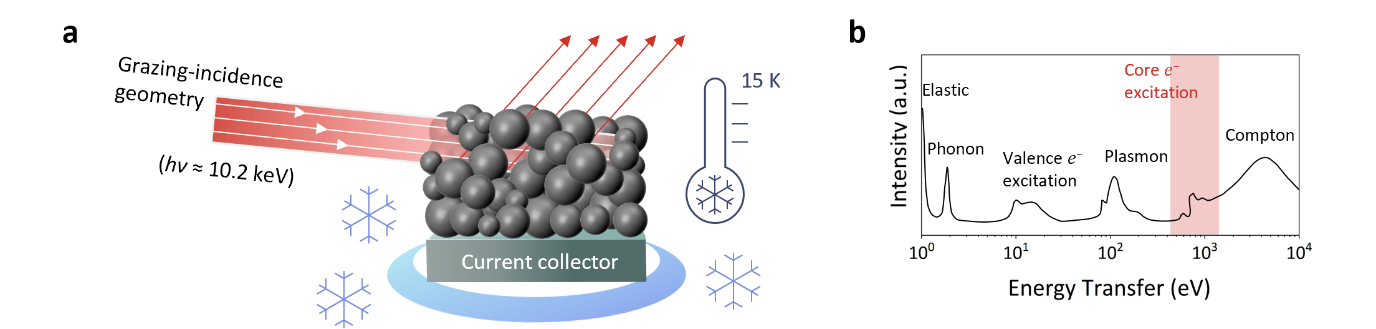
**

**Fig. S1.** **a**, Schematic of cryogenic X-ray Raman spectroscopy. A hard X-ray beam (~10.2 keV) is incident on the electrode at grazing geometry at 15 K. **b**, Schematic illustration of the inelastic X-ray scattering spectrum, showing different excitations across distinct energy loss regions.

**
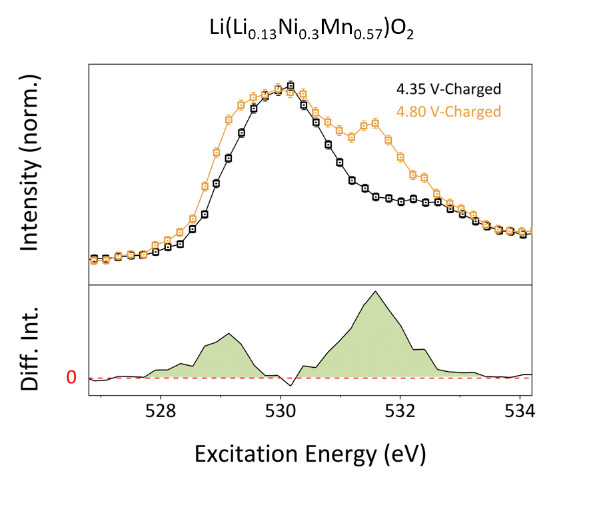
**

**Fig. S2.** Statistically averaged cryogenic XRS O K-edge spectra of Li1.13Ni0.3Mn0.57O2 at two charge cutoff voltages (top), with corresponding differential spectra (bottom). The 4.8 V spectrum is averaged over five independently measured electrodes, and the 4.35 V spectrum is averaged over three independently measured electrodes, confirming reproducible spectral features across distinct samples.

**
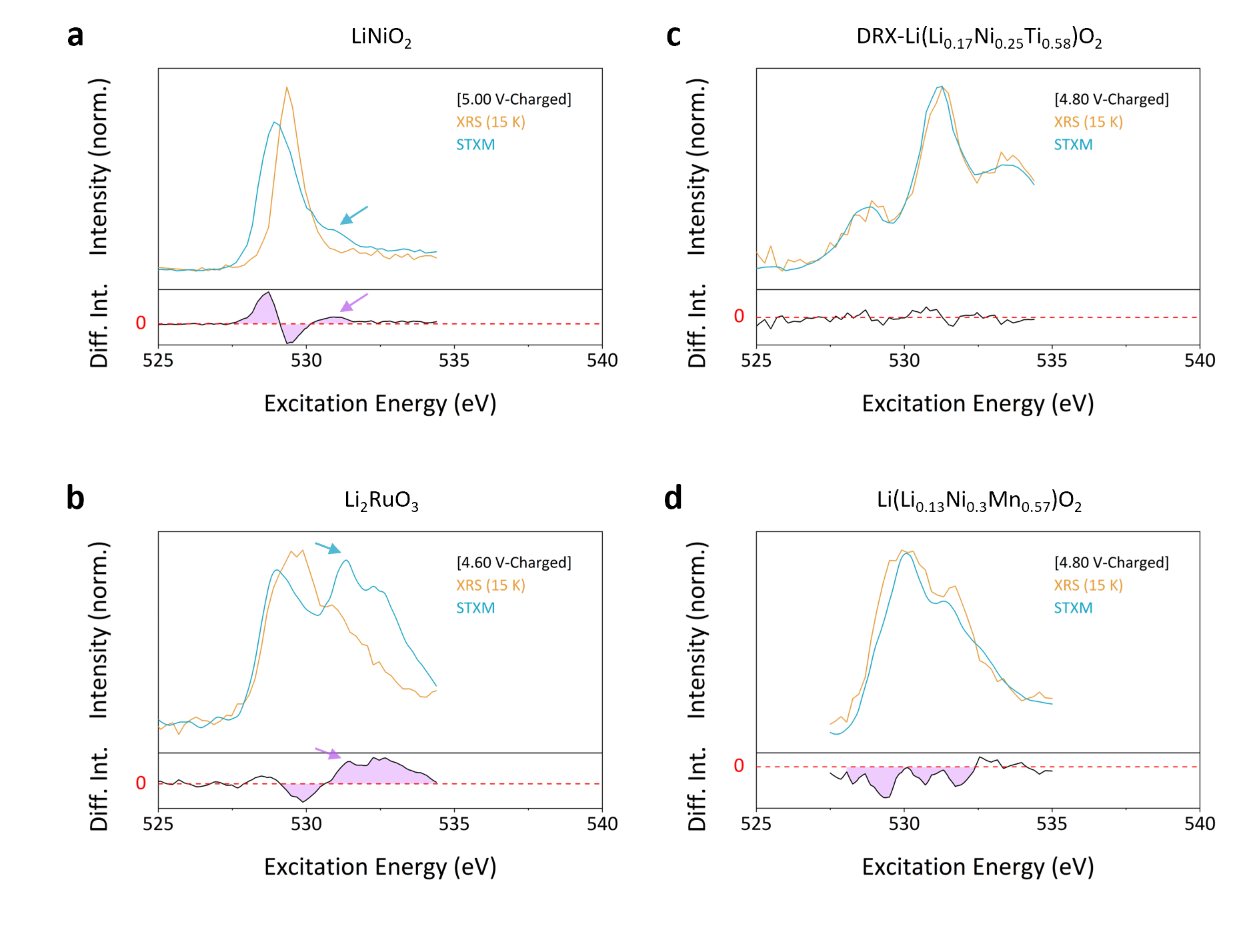
**

**Fig. S3.** Comparison of cryogenic XRS and STXM O K-edge spectra at identical cutoff voltages (top), along with differential spectra obtained by subtracting XRS from STXM (bottom).

**
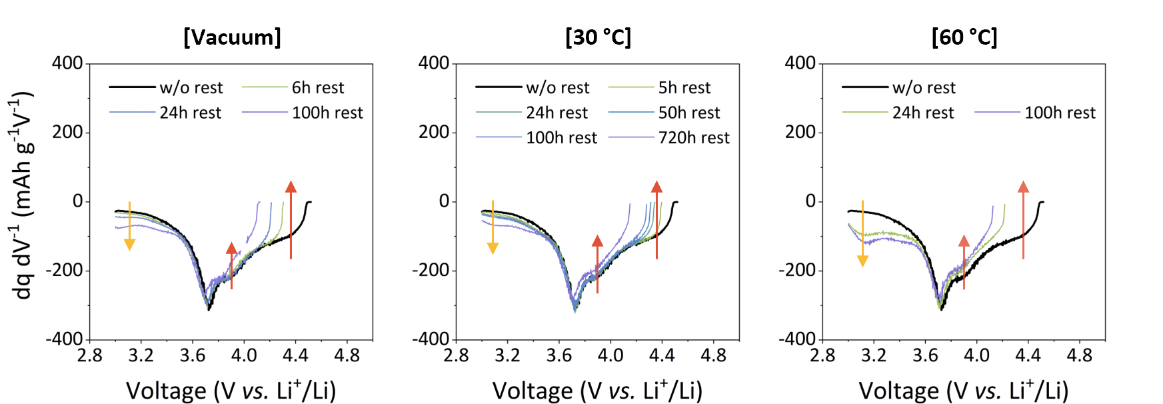
**

**Fig. S4.** Discharge differential voltage curves under different aging conditions (vacuum, 30 °C, and 60 °C) at the midpoint of the voltage plateau, corresponding to the half-activated OR state. Curves are shown as a function of aging time.

**
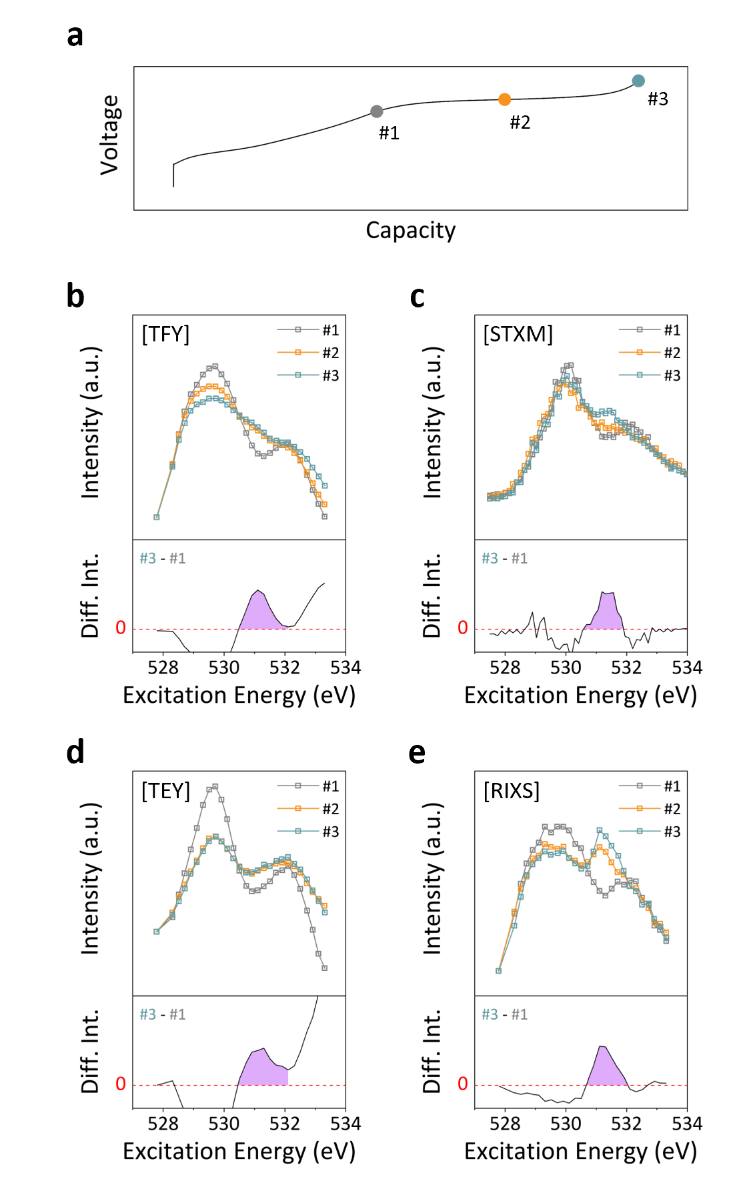
**

**Fig. S5.** **a**, Initial charge curve showing the voltage points at which samples were harvested for spectroscopy measurements. **b**–**e**, O K-edge spectra obtained at states #1 (before OR), #2 (half-activated), and #3 (fully activated) using various soft X-ray techniques (STXM: Scanning Transmission X-ray Microscopy; TFY: Total Fluorescence Yield; TEY: Total Electron Yield; RIXS: Resonant Inelastic X-ray Scattering). Top panels show the spectra results; bottom panels show differential spectra between #1 and #3. The RIXS spectra were obtained by averaging the RIXS maps along the ~523 eV emission energy axis.

**
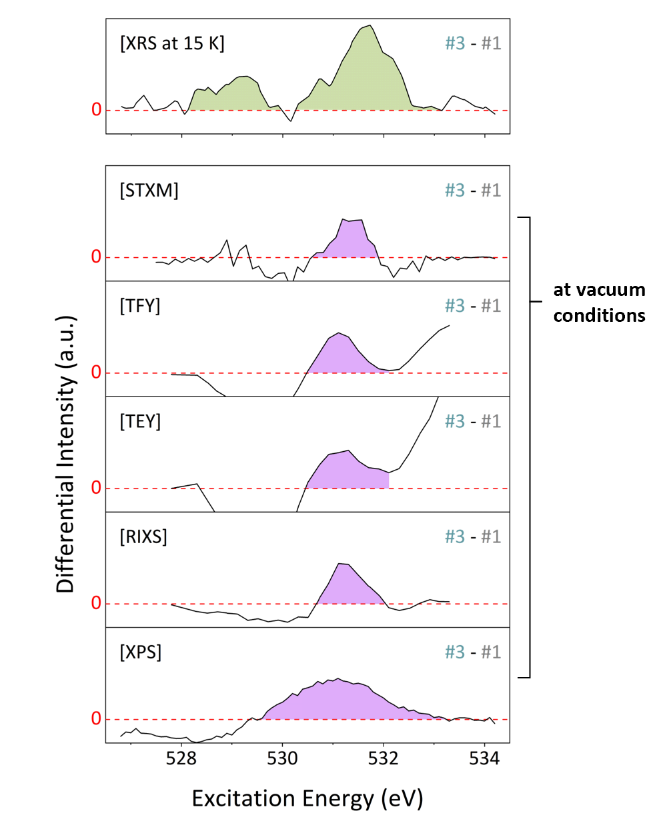
**

**Fig. S6.** Differential spectra between #3 and #1 across multiple spectroscopy techniques. The top panel shows cryogenic XRS results; bottom panels show results from various soft X-ray techniques.

**
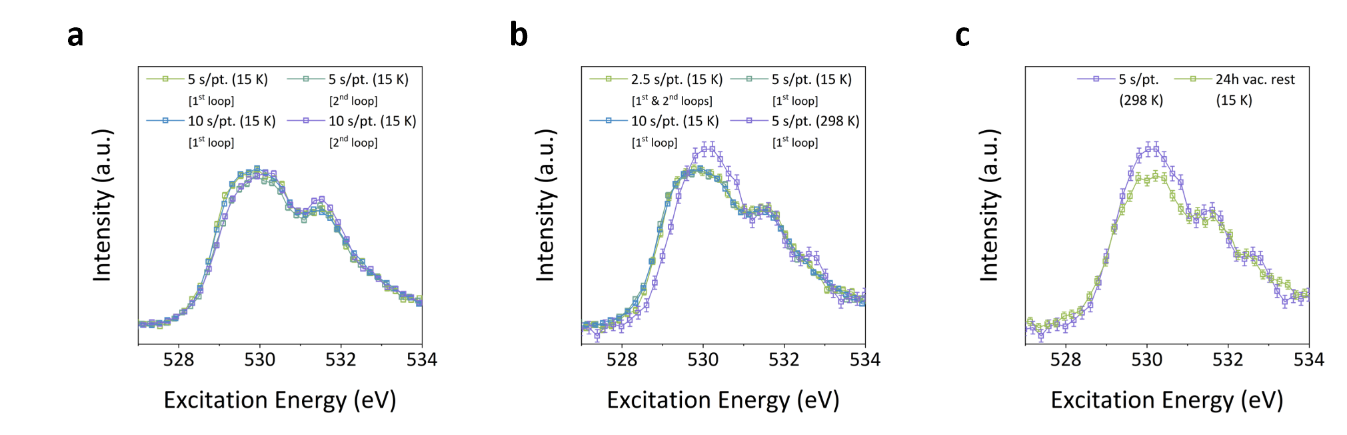
**

**Fig. S7.** **a**, O K-edge spectra of 4.8 V-charged electrodes measured at two X-ray doses (5 and 10 s/point), comparing the 1st and 2nd measurement loops. Each spectrum was averaged over 15–20 positions. Both doses show minor changes near ~529 eV in the 2nd loop, indicating that iterative measurements can introduce beam-irradiation effects even at cryogenic temperatures when the dose is high. **b**, Comparison of O K-edge spectra across different X-ray doses (2.5–10 s/point). For 2.5 s/point, spectra from two loops were averaged due to the low signal-to-noise ratio and the lack of loop-to-loop changes. Negligible spectral changes were observed at 15 K across this dose range, whereas the same dose (5 s/point) at 298 K caused significant loss of the additional features, indicating strong beam effects at room temperature. **c**, Comparison of non-cryogenic spectra (flux-aged) and vacuum-aged cryogenic spectra from Fig. 2D, showing spectra that are nearly overlaid. This similarity indicates that vacuum alone can erase metastable signatures, while irradiation primarily accelerates the same transformation at elevated temperature.

**
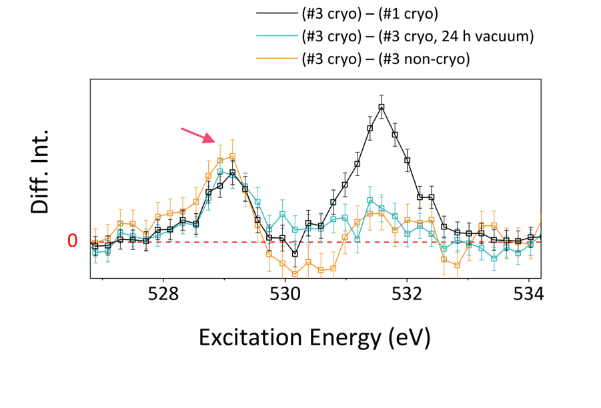
**

**Fig. S8.** Comparison of two differential spectra: (1) cryogenic XRS between #3 and #1 (black), (2) cryogenic versus non-cryogenic measurements at #3 (yellow), and (3) cryogenic XRS at #3 for electrodes harvested immediately at 4.8 V versus after 24-h vacuum exposure (blue). The black curve corresponds to the features that evolve during OR activation under cryogenic conditions, whereas the blue and yellow curves show the magnitude of the features lost under vacuum and irradiation, respectively. For ease of comparison, the vacuum- and irradiation-differential spectra (blue and yellow curves) are plotted with inverted signs so that their decreases can be directly compared with the cryogenic OR-activation features (black curve). Notably, the intensities of the peaks at 528–529.5 eV that diminish under vacuum and irradiation clearly match the features that develop during OR activation. This correspondence indicates that oxidized-oxygen species associated with this energy range are especially susceptible to perturbation during measurement and can be readily missed. Together, these observations illustrate that vacuum-free and cryogenic XRS are essential for preserving and accessing the metastable oxygen-redox signatures in this material.

**
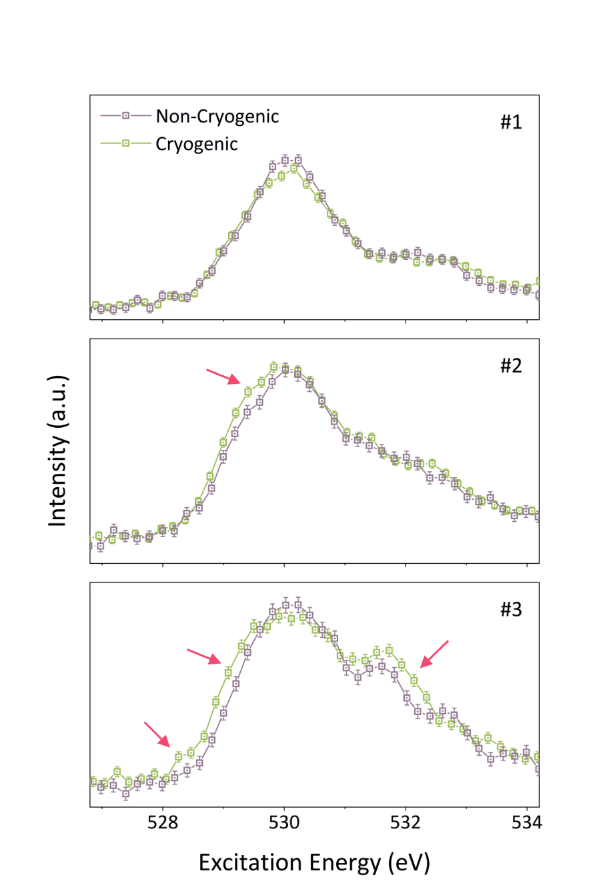
**

**Fig. S9.** Cryogenic and non-cryogenic XRS O K-edge spectra at identical states of charge. Additional features are resolved only under cryogenic conditions (pink arrows). Prior to OR activation (#1), cryogenic and non-cryogenic XRS spectra were identical, confirming that temperature has little influence on the spectral features when OR is not activated (top panel). However, once OR was activated (#2 and #3), clear differences emerged: only cryogenic XRS resolved the additional oxygen-redox features (middle and bottom panels).

**
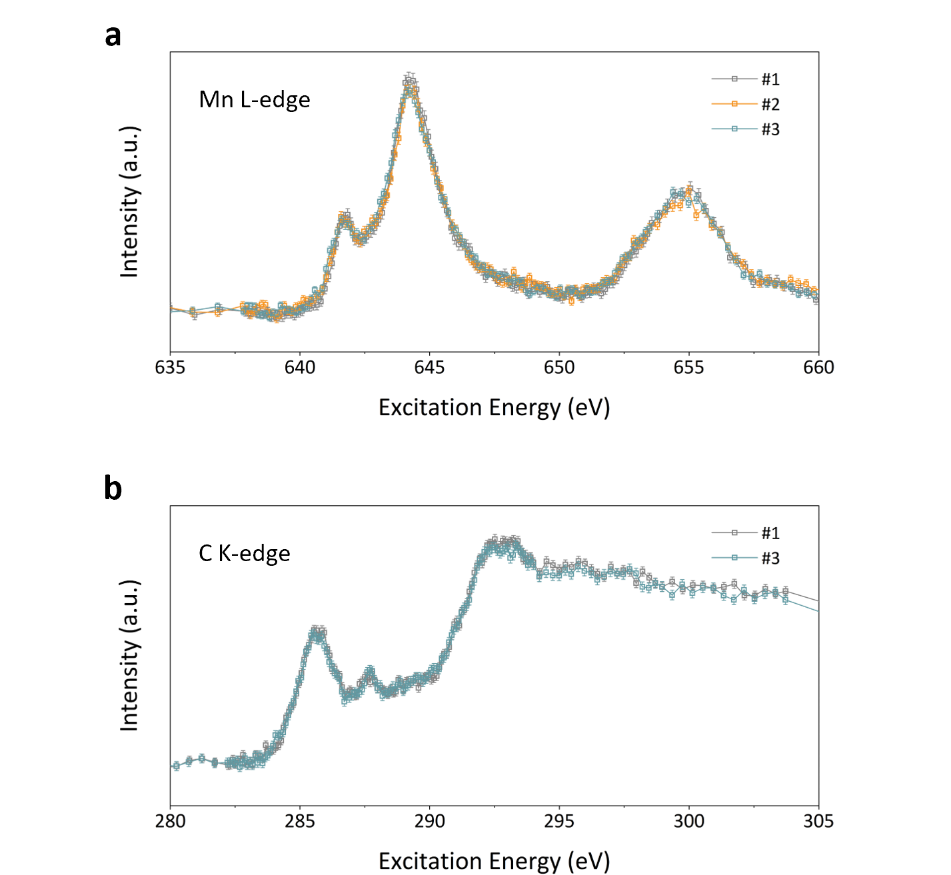
**

**Fig. S10.** Cryogenic XRS **a**, Mn L-edge and **b**, C K-edge spectra at the distinct voltage states shown in **Fig. 3**a, confirming minimal changes in Mn and C electronic structures during OR.

**
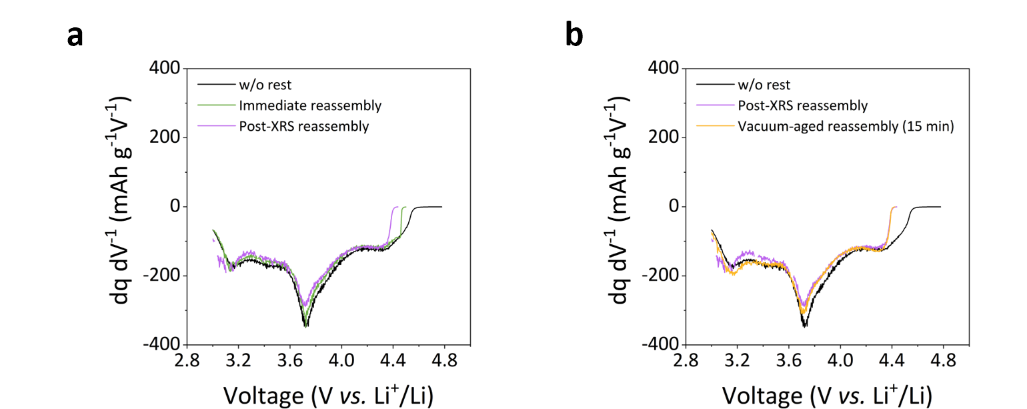
**

**Fig. S11.** Discharge differential voltage curves used to assess potential degradation from cryogenic XRS measurements. **a**, Comparison of three conditions: baseline discharge without rest; discharge after cell disassembly and immediate reassembly (control for handling effects); and discharge using the electrode after cryogenic XRS measurement. **b**, Similar comparison with an additional condition: discharge using an electrode exposed to 15 min vacuum in a glovebox chamber (to simulate vacuum exposure during sample transfer back into the glovebox), followed by cell reassembly. Baseline and cryo-XRS conditions are repeated from **a**.

**
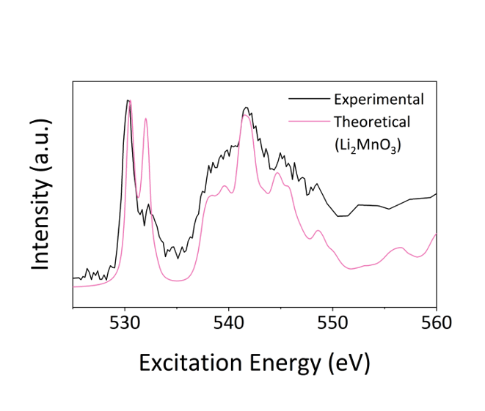
**

**Fig. S12.** Comparison between the experimental cryogenic O K-edge spectrum of the pristine electrode and a simulated spectrum based on the Li2MnO3 structure.

**
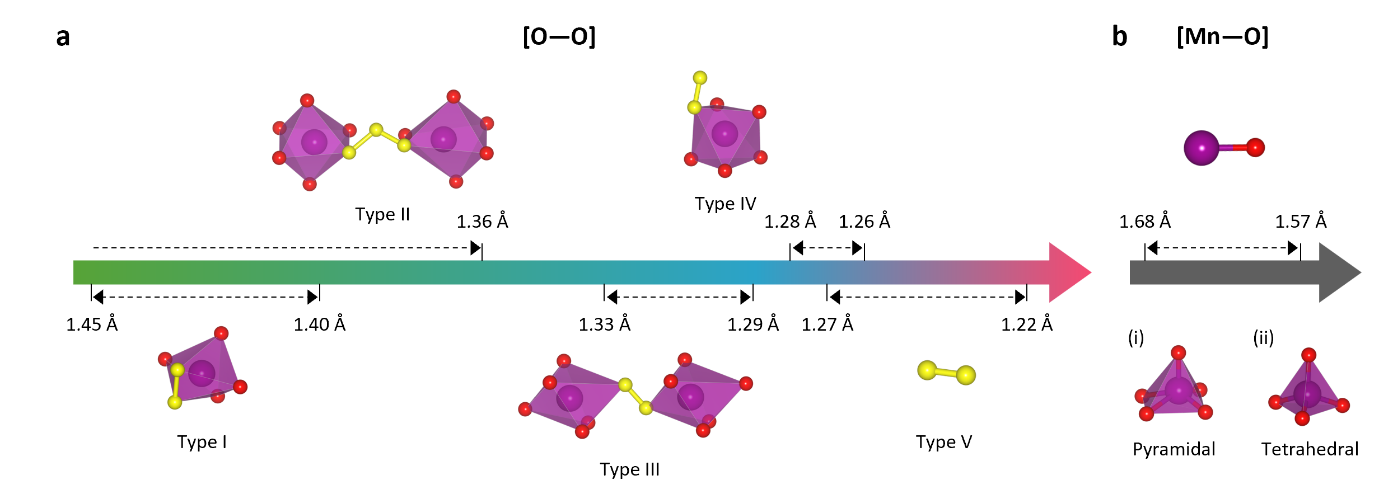
**

**Fig. S13.** Oxygen configurations enumerated from DFT calculations. Different O–O bonding types and short Mn–O bonds emerge upon OR activation. Each O–O species exhibits a characteristic bond length range, as indicated in the figure. Short Mn–O bonds, typically below 1.7 Å due to strong *π*-interactions (compared to the original 1.93 Å), appear only when the oxygen coordination number decreases from 6 to 5 (pyramidal) or 4 (tetrahedral), driven by Mn migration or oxygen decoordination.

**
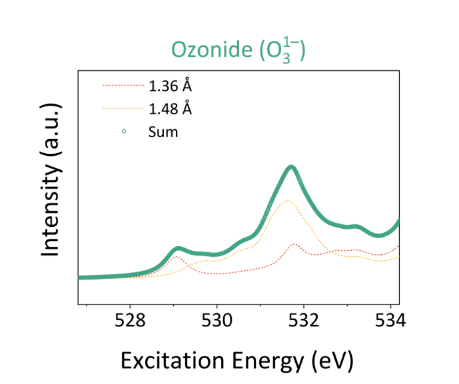
**

**Fig. S14.** Simulated oxygen K-edge X-ray absorption spectra for ozonide configurations, systematically enumerated across varying lithium contents in Li2MnO3.

**
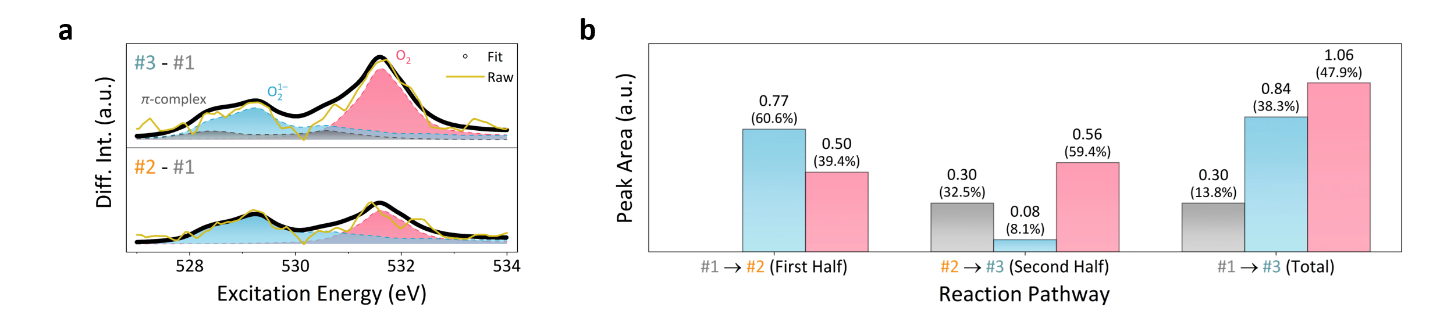
**

**Fig. S15.** **a**, Fitting results of the differential spectra using simulated spectra. **b**, Quantification of redox products across different regions on the high-voltage plateau. Numbers above the bar charts represent the areal contribution of each species formed during the indicated interval, with corresponding percentages.

**
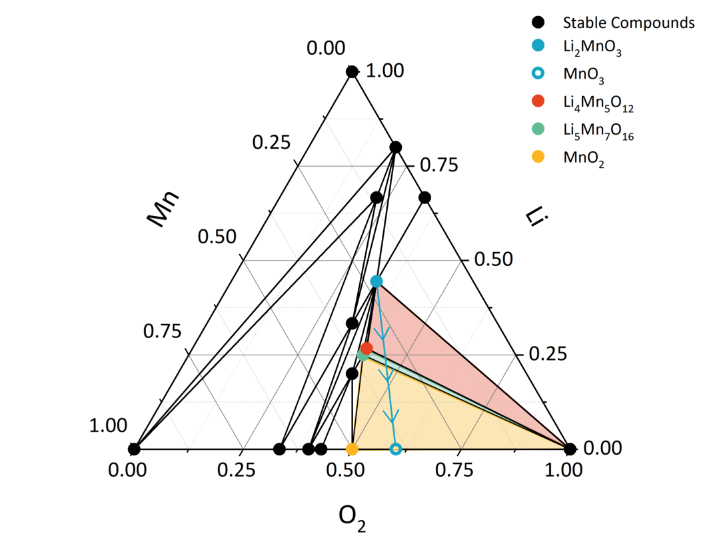
**

**Fig. S16.** Li–Mn–O ternary phase diagram showing the charging pathway of Li2MnO3. The pathway crosses three distinct compositional regions; each associated with gaseous oxygen and spinel-like phase formation.

**
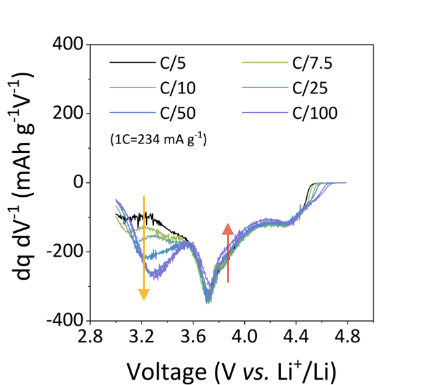
**

**Fig. S17.** Discharge differential voltage curves under various current densities.

**
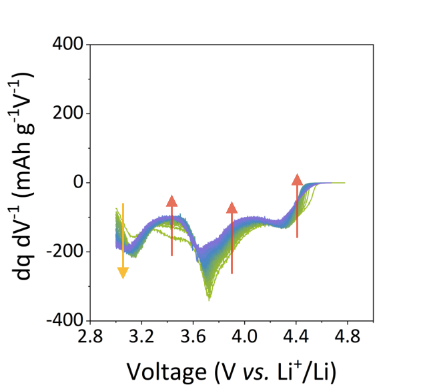
**

**Fig. S18.** Discharge differential voltage curves over 100 electrochemical cycles.

**References**

1 Gent, W. E. et al. Coupling between oxygen redox and cation migration explains unusual electrochemistry in lithium-rich layered oxides. *Nat. Commun.* **8**, 2091 (2017).

2 Hong, J. et al. Metal–oxygen decoordination stabilizes anion redox in Li-rich oxides. *Nat. Mater.* **18**, 256–265 (2019).

3 Dai, K. et al. High reversibility of lattice oxygen redox quantified by direct bulk probes of both anionic and cationic redox reactions. *Joule* **3**, 518–541 (2019).

4 Oishi, M. et al. Direct observation of reversible oxygen anion redox reaction in Li-rich manganese oxide, Li2MnO3, studied by soft X-ray absorption spectroscopy. *J. Mater. Chem. A* **4**, 9293–9302 (2016).

5 Chen, Z., Li, J. & Zeng, X. C. Unraveling oxygen evolution in Li-rich oxides: a unified modeling of the intermediate peroxo/superoxo-like dimers. *J. Am. Chem. Soc.* **141**, 10751–10759 (2019).

6 Kim, B. et al. A theoretical framework for oxygen redox chemistry for sustainable batteries. *Nat. Sustainability*, **5**, 708–716 (2022).

7 Zhuo, Z. et al. Cycling mechanism of Li2MnO3: Li–CO2 batteries and commonality on oxygen redox in cathode materials. *Joule*, **5**, 975–997 (2021).

8 Linstrom, P. J. & Mallard, W. G. The NIST Chemistry WebBook:  A Chemical Data Resource on the Internet. *J. Chem. Eng. Data*, **46**, 1059–1063 (2001).
